# Supplementary material for: Aggregation-induced emission enhancement of gold nanoclusters in metal–organic frameworks for highly sensitive fluorescent detection of bilirubin
Source: Royal Society of Chemistry journal article supplement (doi:10.1039/d0an02076a), 2020-12-08
Supplement: d0an02076a1.pdf [file d0an02076a1.pdf]

## Supporting Information

### **Aggregation-induced Emission Enhancement of Gold Nanoclusters in Metal–organic Frameworks for Highly Sensitive Fluorescent Detection of Bilirubin**

Mengfan Xia<sup>a,b</sup>, Yucun Sui<sup>a,b</sup>, Ying Guo<sup>a,b</sup>, Yaodong Zhang<sup>a,b,\*</sup>

<sup>a</sup>Key Laboratory of Applied Surface and Colloid Chemistry of Ministry of Education, <sup>b</sup>Key Laboratory of Analytical Chemistry for Life Science of Shaanxi Province, School of Chemistry and Chemical Engineering, Shaanxi Normal University, Xi'an 710062, PR China.

\* Corresponding author.

E-mail: ydzhang@snnu.edu.cn; Fax: +86-29-81530727; Tel: +86-29-81530726

### **Table of Contents**

**Section S1.** Characterization of ZIF-8 and AuNCs@ZIF-8

**Section S2.** Response time of AuNCs@ZIF-8 to BR

**Section S3.** Possible mechanism of AuNCs@ZIF-8 for sensing BR

**Section S4.** Comparison of the performance of methods for detection of BR

**Section S1. Characterization of ZIF-8 and AuNCs@ZIF-8**

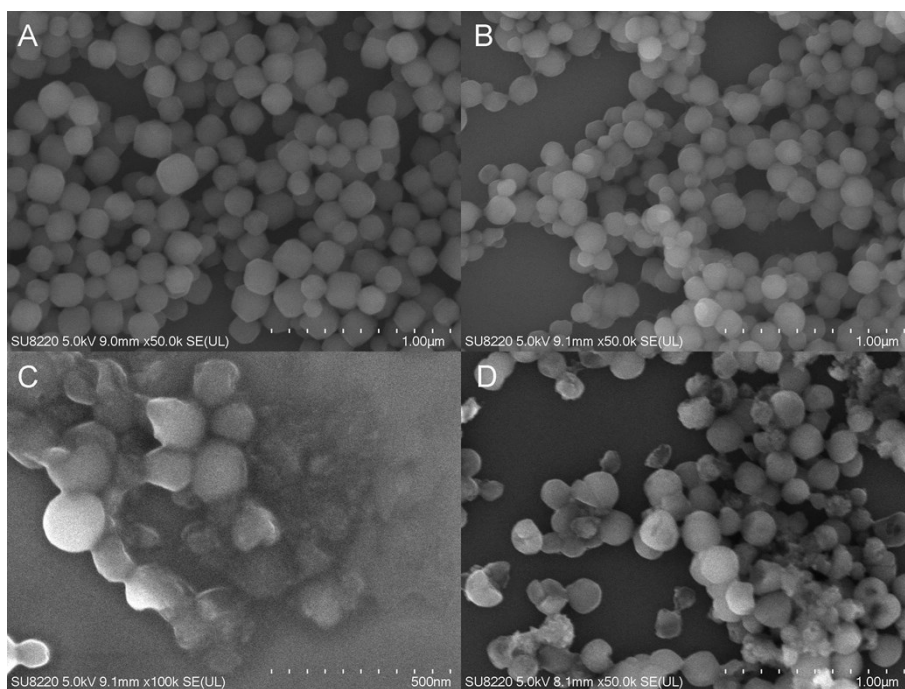

**Figure S1.** SEM images of ZIF-8(A) ,AuNCs@ZIF-8(B) and AuNCs@ZIF-8 after adding BR(C,D)

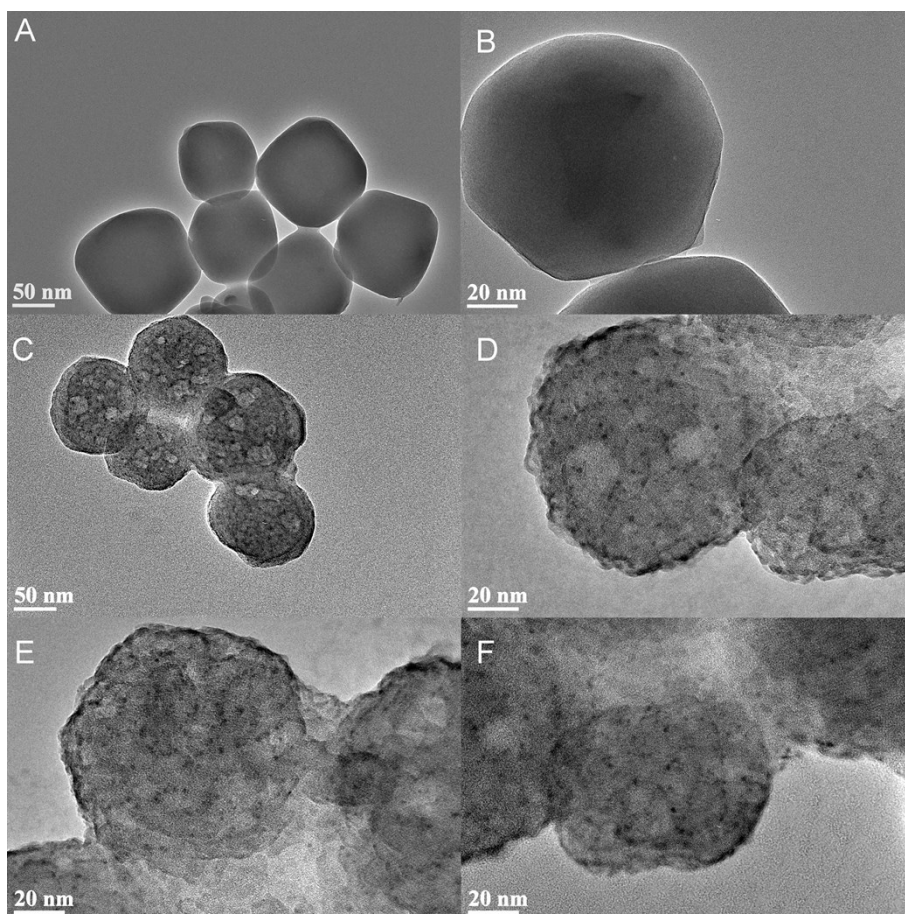

**Figure S2.** TEM images of ZIF-8(A,B) and AuNCs@ZIF-8(C,D,E,F)

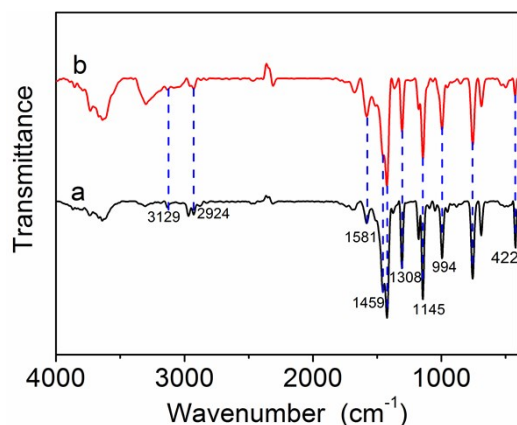

Figure S3. FTIR spectra for ZIF-8(a) and AuNCs@ZIF-8(b) (The peak at  $422\text{ cm}^{-1}$  is attributed to the Zn-N stretching vibration. The bands in the spectral region of  $500\text{--}1350\text{ cm}^{-1}$  ( $994\text{ cm}^{-1}$ ,  $1145\text{ cm}^{-1}$  and  $1308\text{ cm}^{-1}$ ) are assigned as the plane bending and stretching of imidazole ring, respectively. The C=N stretch mode which is expected at  $1459\text{ cm}^{-1}$  and  $1581\text{ cm}^{-1}$ . The absorption peaks at  $2924\text{ cm}^{-1}$  and  $3129\text{ cm}^{-1}$  are due to the N-H and C-H stretching vibrations, respectively.<sup>1,2)</sup>

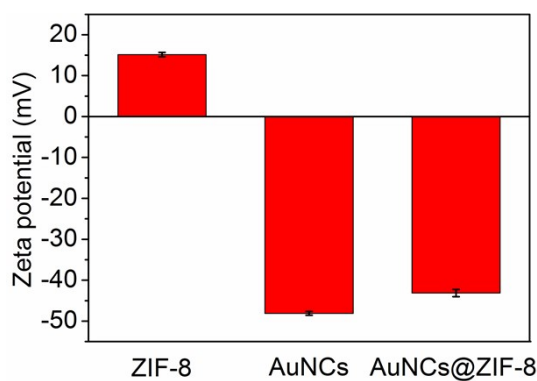

Figure S4. Zeta potential for ZIF-8, AuNCs and AuNCs@ZIF-8

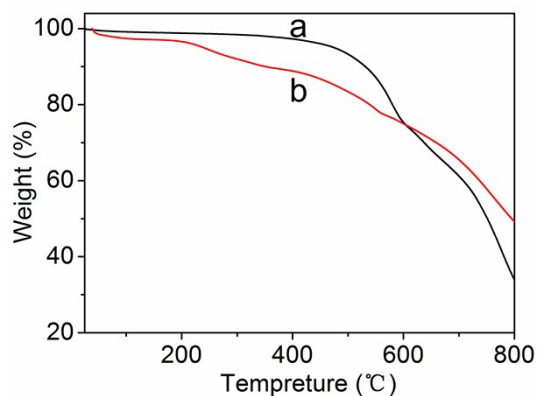

Figure S5. TGA curve of ZIF-8(a) and AuNCs@ZIF-8(b)

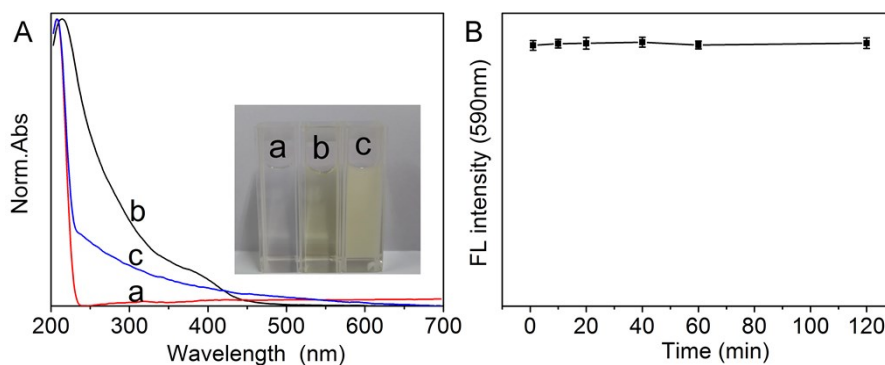

Figure S6. (A) UV-vis absorption spectra of ZIF-8(a), AuNCs (b), and AuNCs @ZIF-8 (c). The inset shows the photographs of ZIF-8(a), AuNCs (b), and AuNCs@ZIF-8 (c) under daylight. (B) Fluorescence intensity variation in AuNCs@ZIF-8 for 120 min.

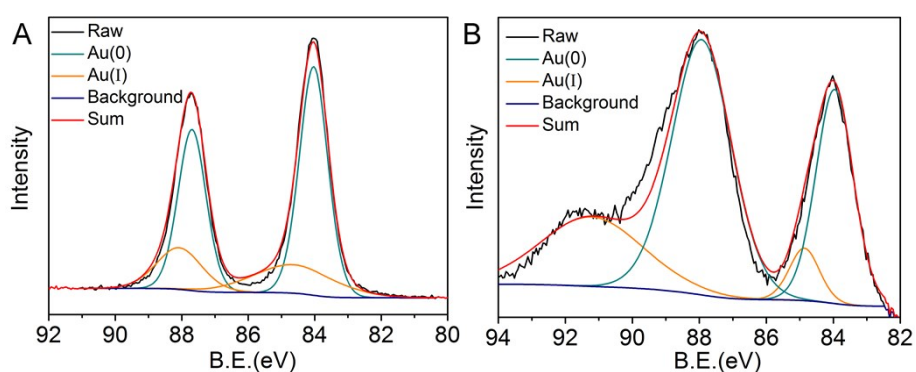

Figure S7. XPS spectrum of Au NCs (A) and AuNCs@ZIF-8 (B)

### Section S2. Response time of AuNCs@ZIF-8 to BR

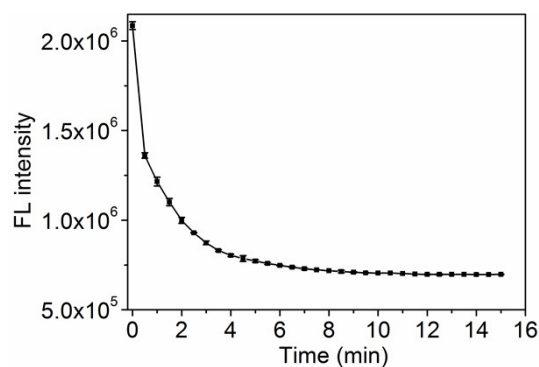

Figure S8. Time-dependent fluorescence emission intensity of AuNCs@ZIF-8 upon the addition of bilirubin (6  $\mu$ M)

### Section S3. Possible mechanism of AuNCs@ZIF-8 for sensing BR

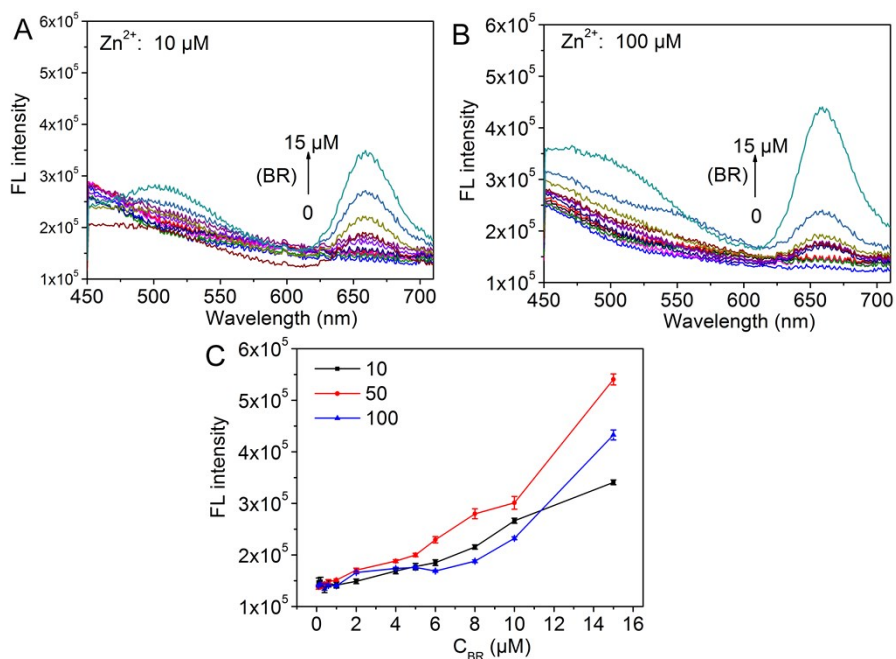

Figure S9. Fluorescence emission spectra of  $Zn^{2+}$  ( $10 \mu M$ , A) or  $Zn^{2+}$  ( $100 \mu M$ , B) with different concentrations of BR. (C) Fluorescence emission intensity ( $660 \text{ nm}$ ) of different concentrations of  $Zn^{2+}$  with different concentrations of BR.

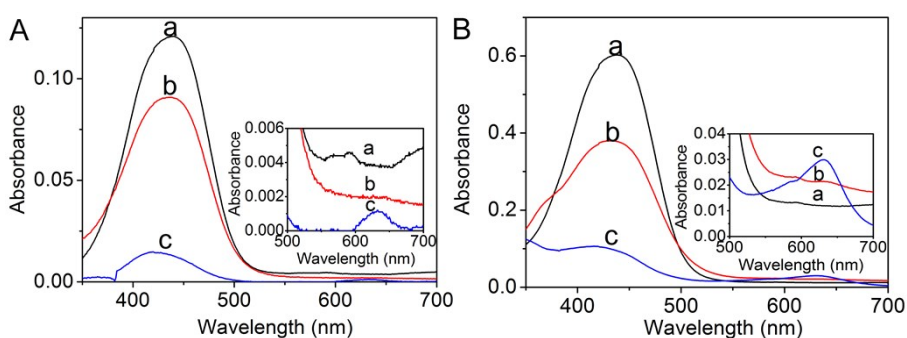

Figure S10. (A) UV-vis absorption spectra of BR ( $2 \mu M$ , a) with  $Zn^{2+}$  ( $50 \mu M$ , b) or AuNCs@ZIF-8 ( $0.06 \text{ mg/mL}$ , c) after centrifugation (inset: magnified view between  $500\text{--}700 \text{ nm}$ ). (B) UV-vis absorption spectra of BR ( $10 \mu M$ , a) with  $Zn^{2+}$  ( $50 \mu M$ , b) or AuNCs@ZIF-8 ( $0.06 \text{ mg/mL}$ , c) after centrifugation (inset: magnified view between  $500\text{--}700 \text{ nm}$ )

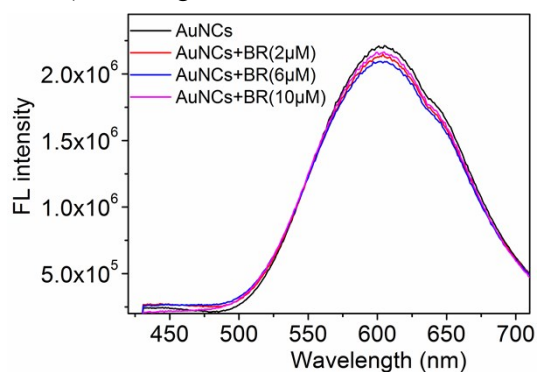

Figure S11. Emission spectra of Au NCs containing different concentrations of BR.

**Section S4.** Comparison of the performance of methods for detection of BR

Table S1. Comparison of the performance of methods for detection of BR

| Materials                     | Principle                                                                       | Linear Range                                        | LOD                                        | Reference    |
|-------------------------------|---------------------------------------------------------------------------------|-----------------------------------------------------|--------------------------------------------|--------------|
| HAS-AuNCs                     | Interaction between<br>BR and HSA                                               | 1-50 $\mu\text{M}$                                  | 0.248 $\mu\text{M}$                        | 3            |
| HSA-CuNCs                     | Binding attraction between<br>BR and HAS-CuNCs                                  | 1.25-7.50 $\mu\text{M}$<br>5.00-28.75 $\mu\text{M}$ | 0.035 $\mu\text{M}$<br>0.145 $\mu\text{M}$ | 4            |
| BSA-Cu<br>Nanoclusters        | Fluorescence regain by the<br>addition of BR to<br>$\text{Fe}^{3+}$ + BSA-CuNCs | 0.1 pM-0.1 $\mu\text{M}$                            | 6.62 nM                                    | 5            |
| Mn:ZnS QDs                    | PET*                                                                            | 10.99-63.84 $\mu\text{M}$                           | 1.8 $\mu\text{M}$                          | 6            |
| MoS <sub>2</sub> QDs          | FRET* and IIF*                                                                  | 0.5-10 $\mu\text{M}$                                | 2.1 nM                                     | 7            |
| UiO-66(COOH) <sub>2</sub> :Eu | FRET                                                                            | 0-15 $\mu\text{M}$                                  | 0.45 $\mu\text{M}$                         | 8            |
| Eu-MOFs                       | PET and IIF                                                                     | 0-56.6 $\mu\text{M}$                                | 1.75 $\mu\text{M}$                         | 9            |
| Eu(tta) <sub>3</sub>          | Special $\sigma$ -hole bonding<br>between Htta and BR                           | 0-50 $\mu\text{M}$                                  | 0.068 $\mu\text{M}$                        | 10           |
| AuNCs@ZIF-8                   | AIEE*                                                                           | 0.1-5 $\mu\text{M}$                                 | 0.07 $\mu\text{M}$                         | This<br>work |

(PET\*: Photoinduced Electron Transfer. FRET\*: Fluorescent Resonant Energy Transfer. IIF\*: Inner Filter Effect. AIEE\*: Aggregation-induced Emission Enhancement)

## References

- 1 Y. Hu, H. Kazemian, S. Rohani, Y. Huang and Y. Song, *Chem. Commun.*, 2011, **47**, 12694-12696.
- 2 S. Chao, X. Li, Y. Li, Y. Wang and C. Wang, *J. Colloid Interface Sci.*, 2019, **552**, 506-516.
- 3 M. Santhosh, S.R. Chinnadayala, A. Kakoti, P. Goswami, *Biosens. Bioelectron.* 2014, **59**, 370-376.
- 4 R. Rajamanikandan, M. Ilanchelian, *Mater. Sci. Eng. C* , 2019, **98**, 1064-1072.
- 5 M. Jayasree, R.S. Aparna, R.R. Anjana, J.S. Anjali Devi, N. John, K. Abha, A. Manikandan, S. George, *Anal. Chim. Acta*, 2018, **1031**, 152-160.
- 6 K. Abha, J. Nebu, J.S. Anjali Devi, R.S. Aparna, R.R. Anjana, A.O. Aswathy, S. George, *Sensor. Actuator. B Chem.* , 2019, **282**, 300-308.
- 7 K. Shanmugaraj, S.A. John, *Spectrochim. Acta, Part A* ,2019, **215**, 290-296.
- 8 C. Xia, Y. Xu, M.-M. Cao, Y.-P. Liu, J.-F. Xia, D.-Y. Jiang, G.-H. Zhou, R.-J. Xie, D.-F. Zhang, H.-L. Li, *Talanta*,2020, **212** , 120795.
- 9 P. Xu, H.-W. Yang, J.-L. Shi, B. Ding, X.-J. Zhao, E.-C. Yang, *RSC Adv.*,2019, **9**,37584-37593.
- 10 W. Yang, J. Xia, G. Zhou, D. Jiang, Q. Li, S. Wang, X. Zheng, X. Li, Y. Shen, X. Li, *Anal. Bioanal. Chem.*,2018, **410**, 6459-6468.
